# Supplementary material
Source: publisher figshare collection journal article supplement (https://acs.figshare.com/ndownloader/files/4300768)
Supplement: Supplementary file 1 [file 4300768]

# Spectroscopic and Microscopic Investigation of Gold Nanoparticle Formation: Ligand and Temperature Effects on Rate and Particle Size

Rajesh Sardar and Jennifer S. Shumaker-Parry\*

Department of Chemistry, University of Utah, 315 South 1400 East, RM 2020, Salt Lake City, Utah 84112

\*Corresponding author E-mail: shumaker-parry@chem.utah.edu

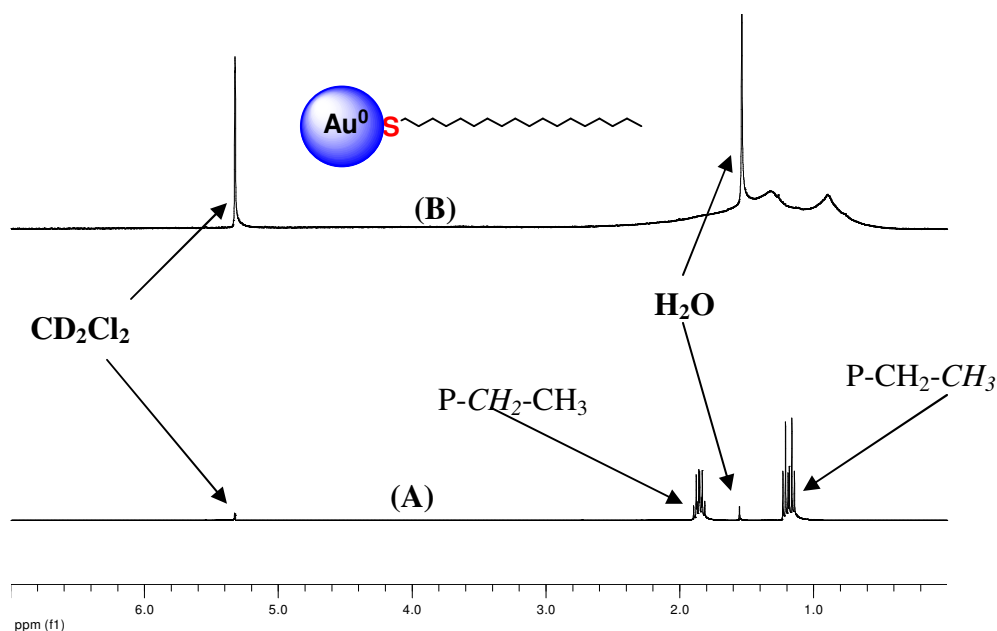

**SI-Figure 1:** (A)  $^1\text{H}$  NMR of pure  $\text{Et}_3\text{PAu}$  in  $\text{CD}_2\text{Cl}_2$ . (B)  $^1\text{H}$  NMR of ODT capped AuNPs in  $\text{CD}_2\text{Cl}_2$ . The broad peaks at 0.9 and 1.4 ppm indicate that the thiols are attached on the AuNPs surface. The spectra were obtained using a Bruker model DRX 400 MHz spectrometer with a 5 s relaxation delay time.

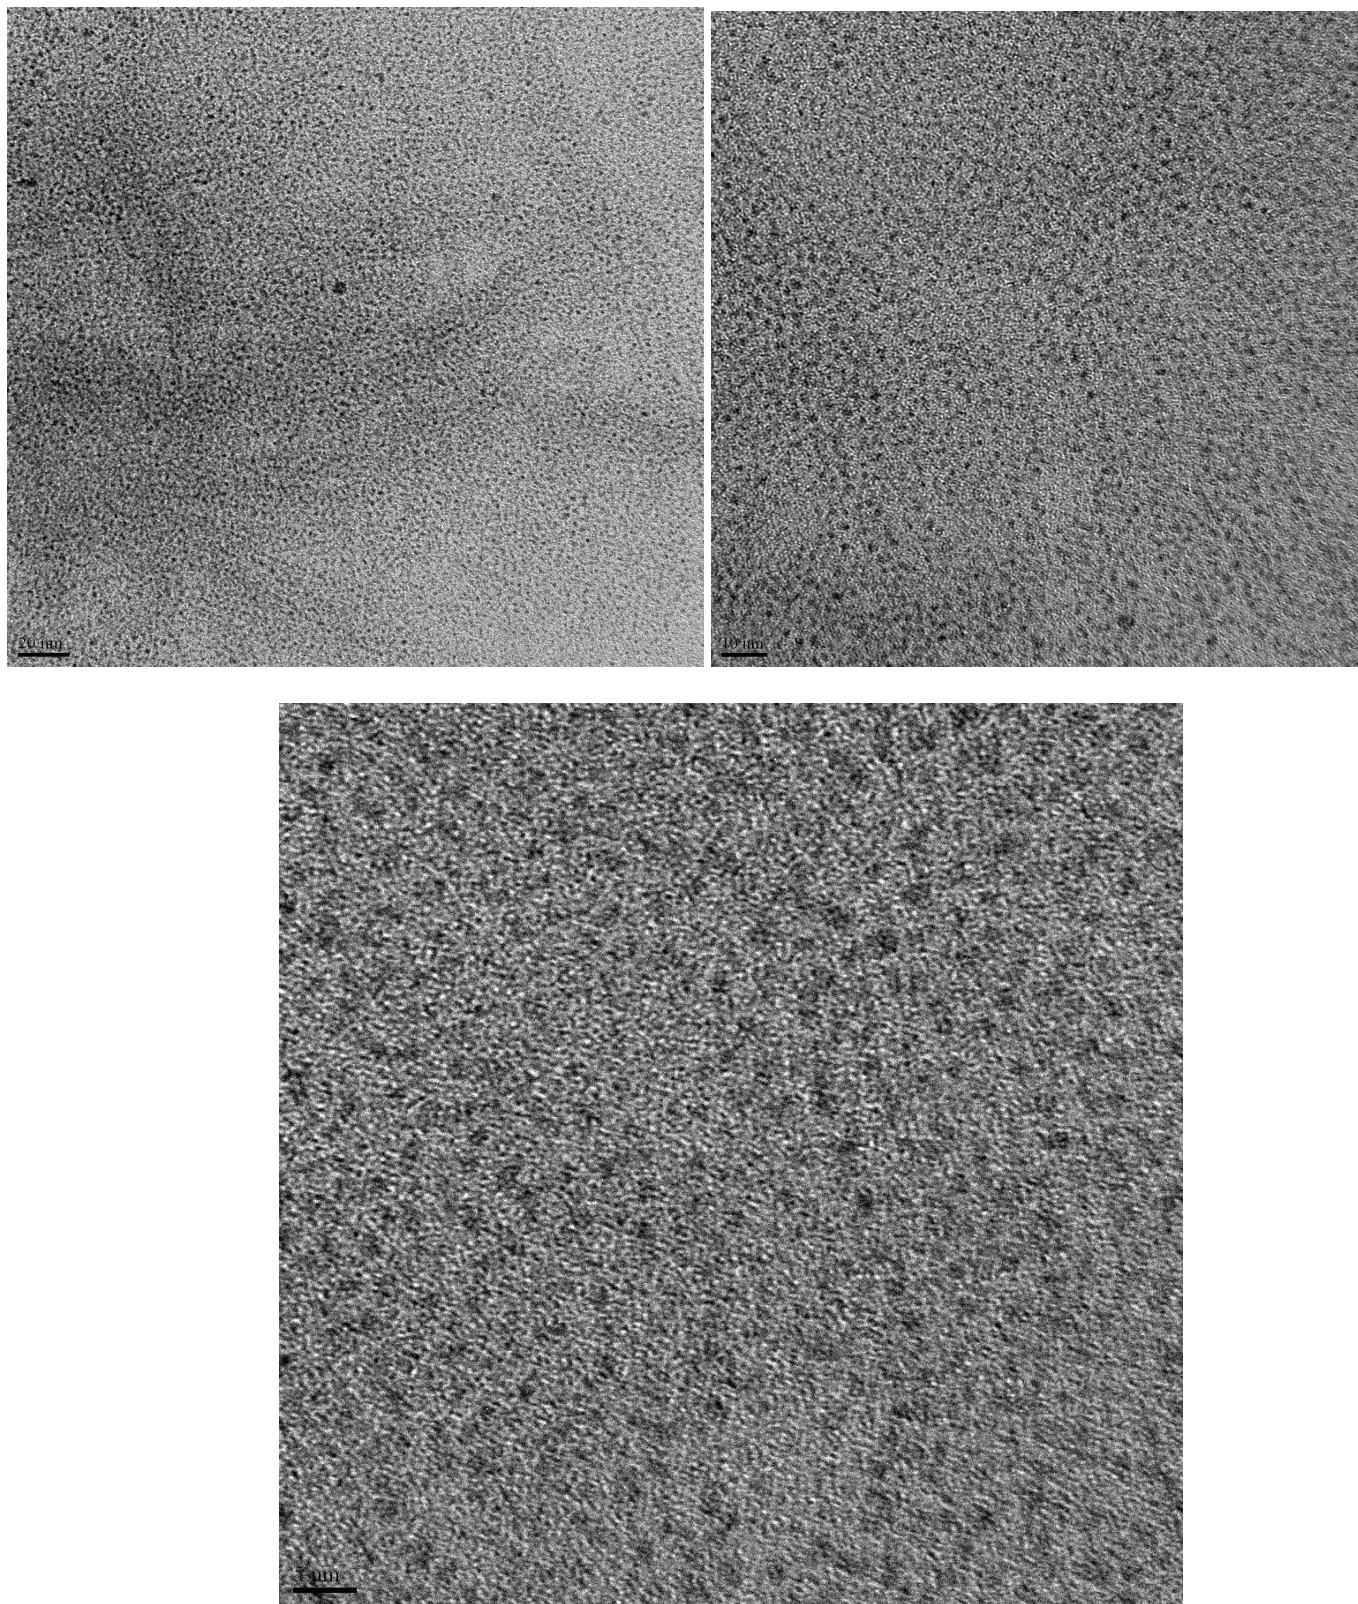

**SI-Figure 2:** HRTEM images of AuNPs after 2 minutes of addition of 9-BBN.

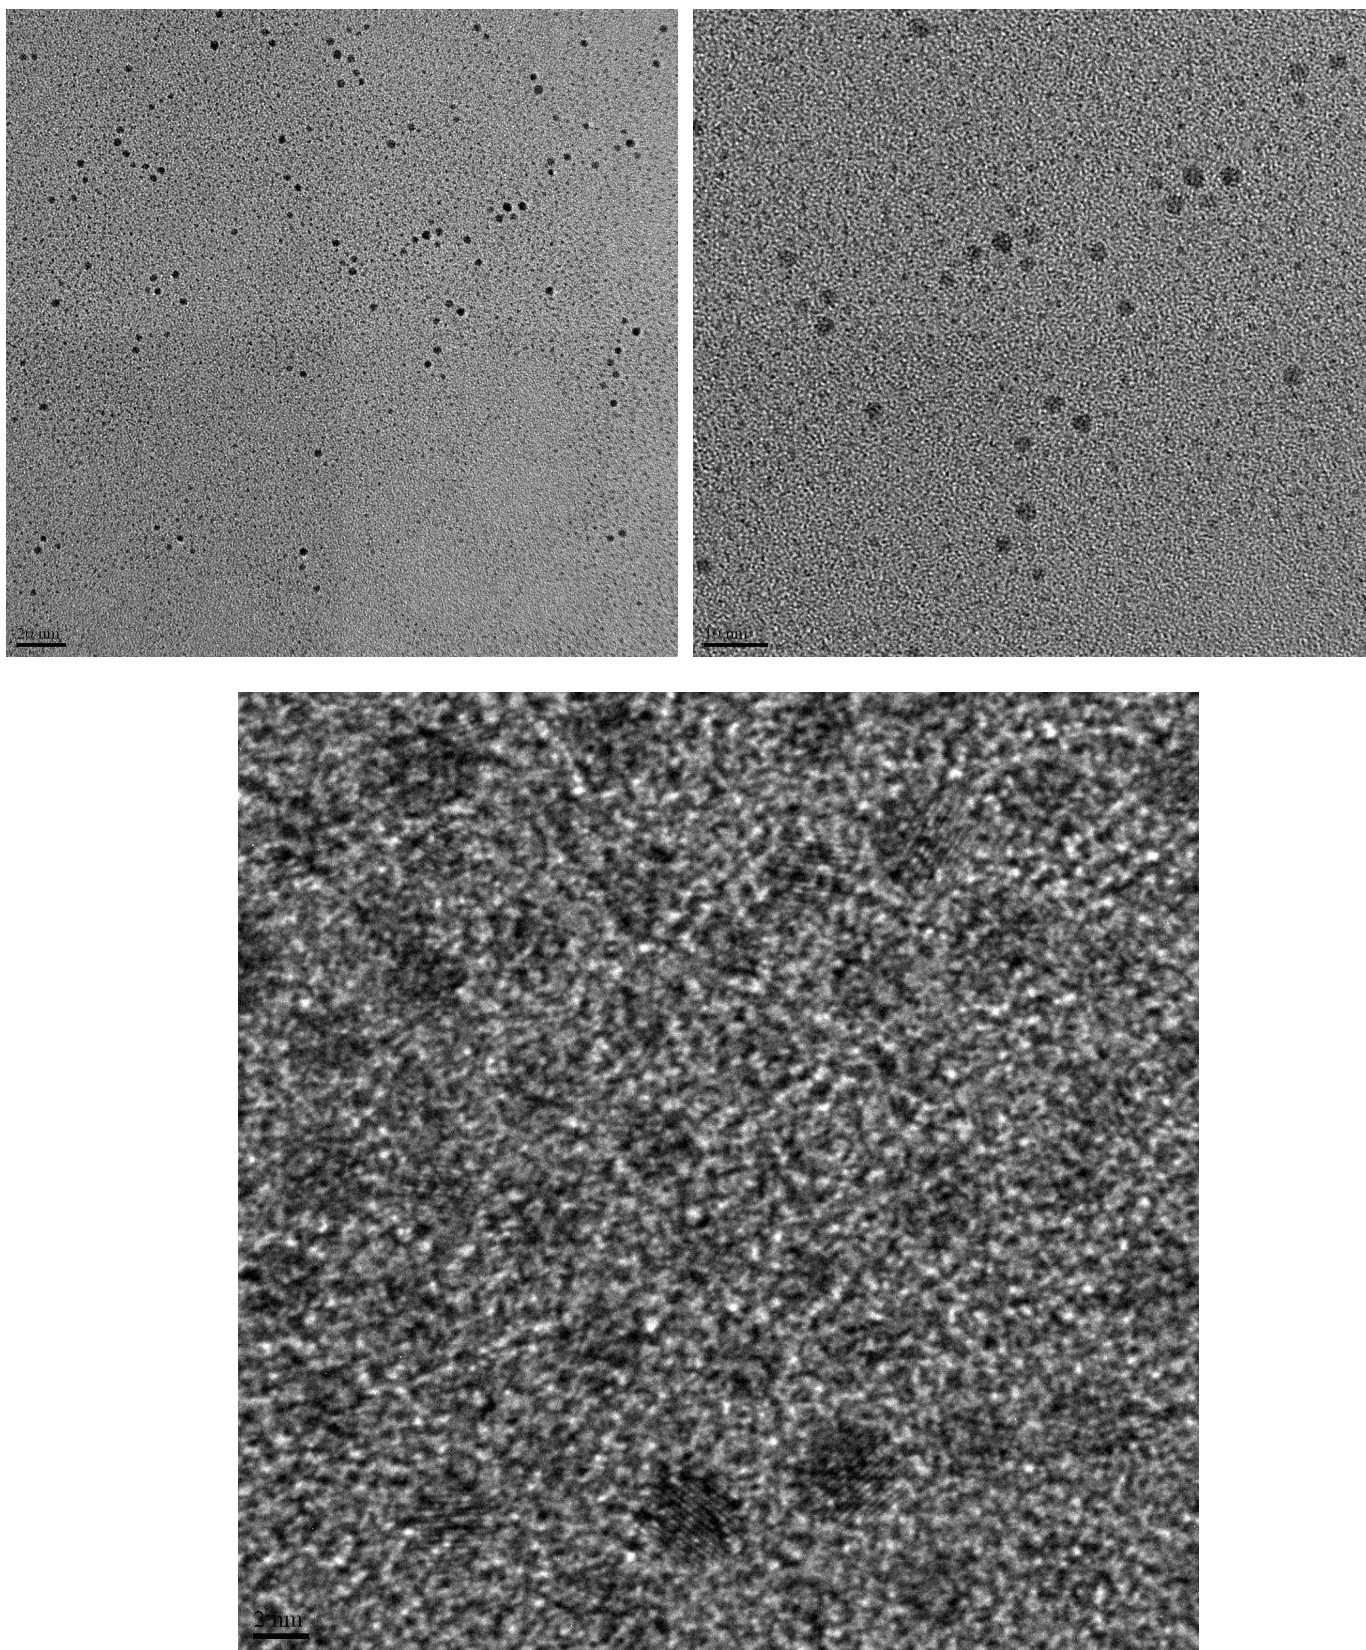

**SI-Figure 3:** HRTEM images of AuNPs 5 minutes after addition of 9-BBN.



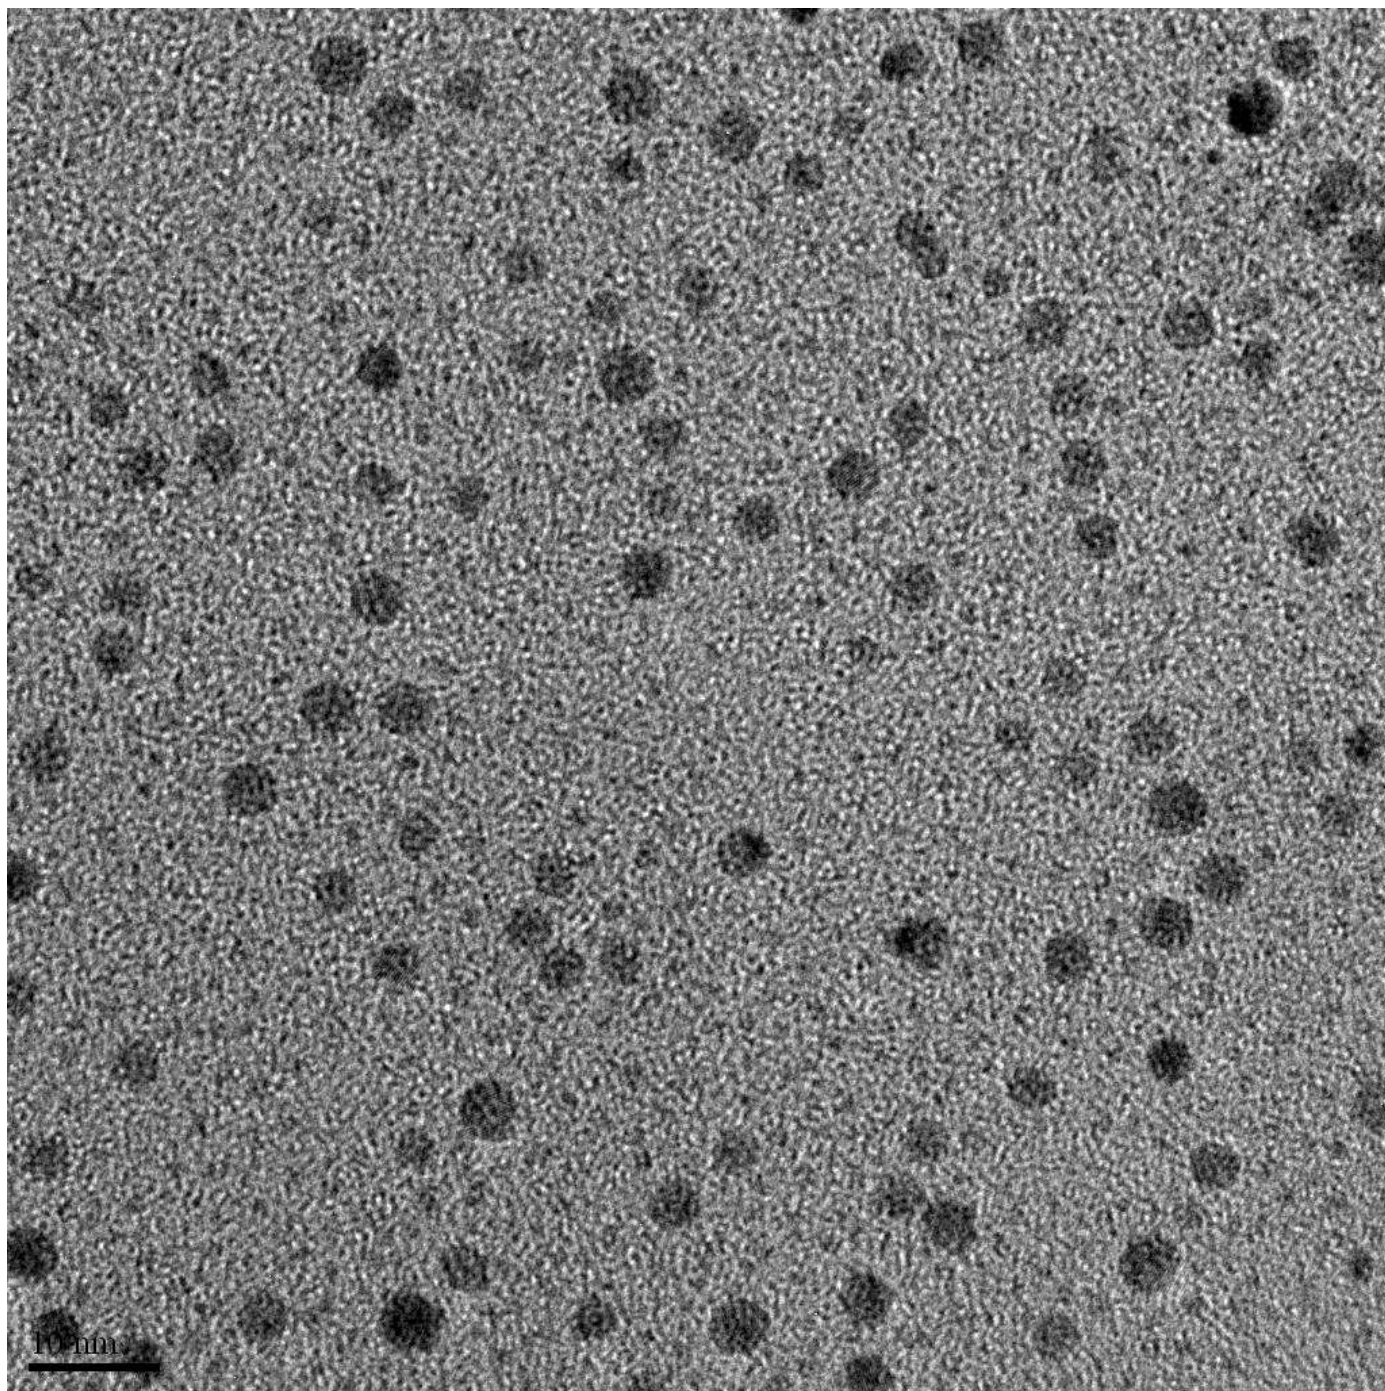

**SI-Figure 4:** HRTEM images of AuNPs 30 minutes after of addition of 9-BBN.

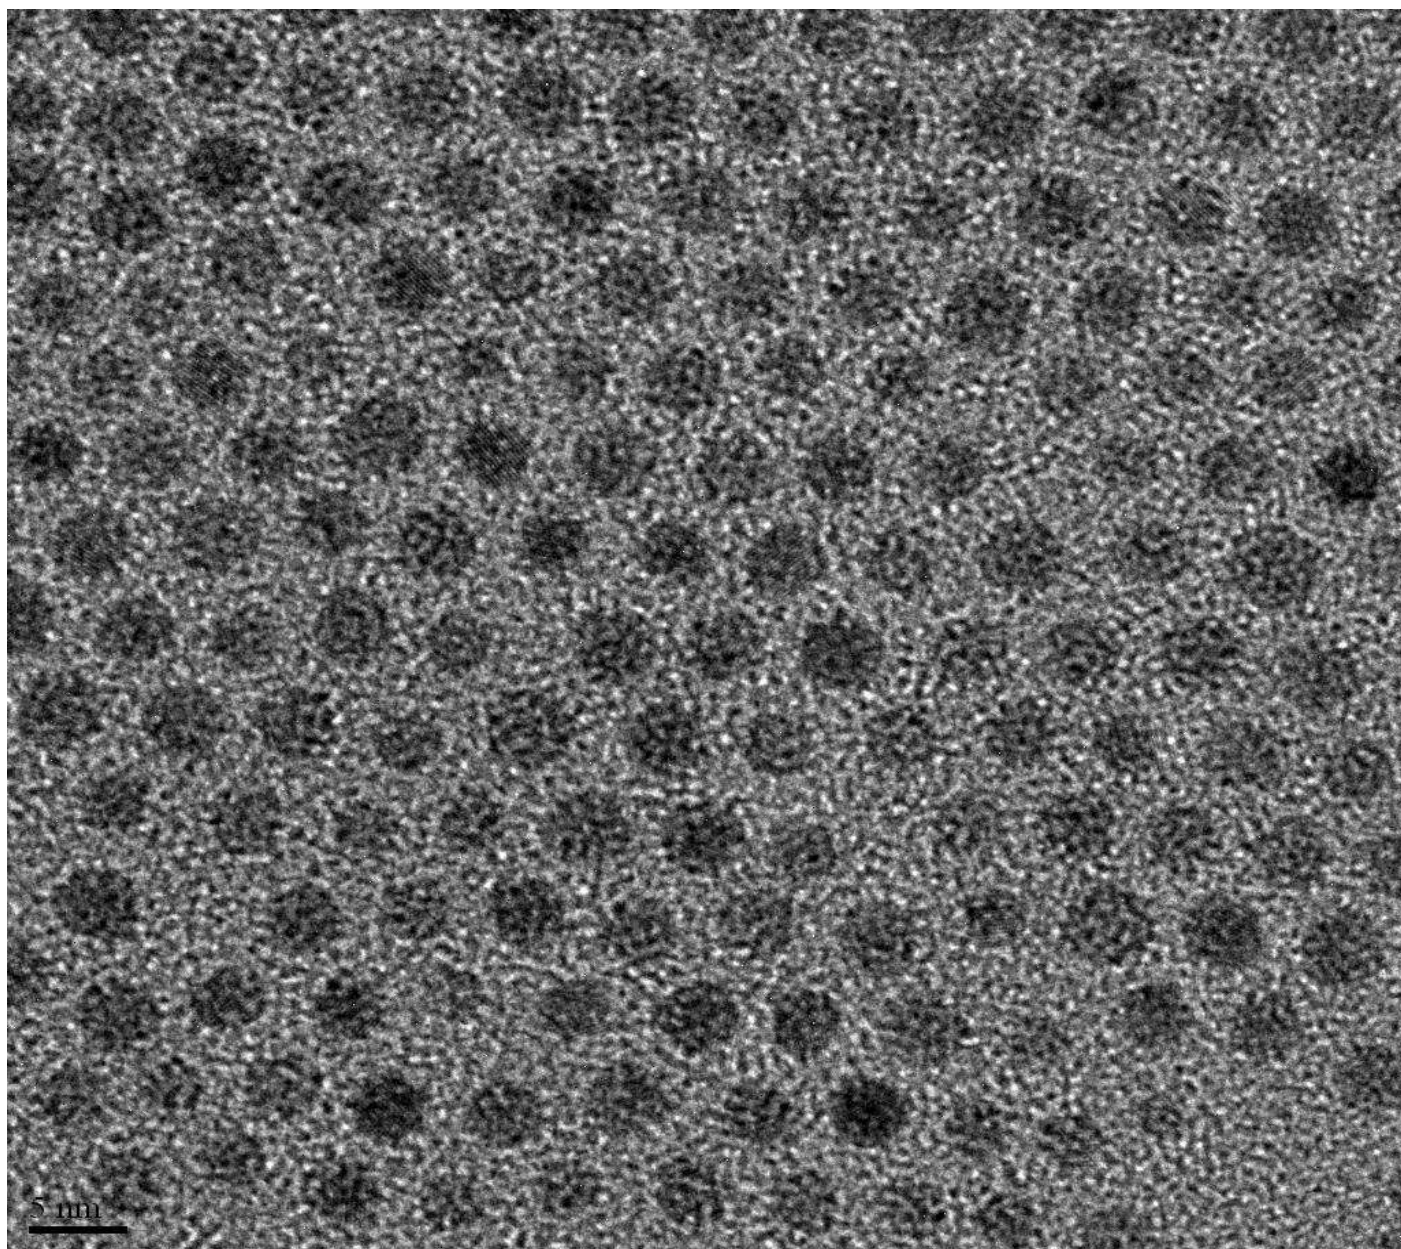

**SI-Figure 5:** HRTEM images of AuNPs after 65 minutes of addition of 9-BBN.

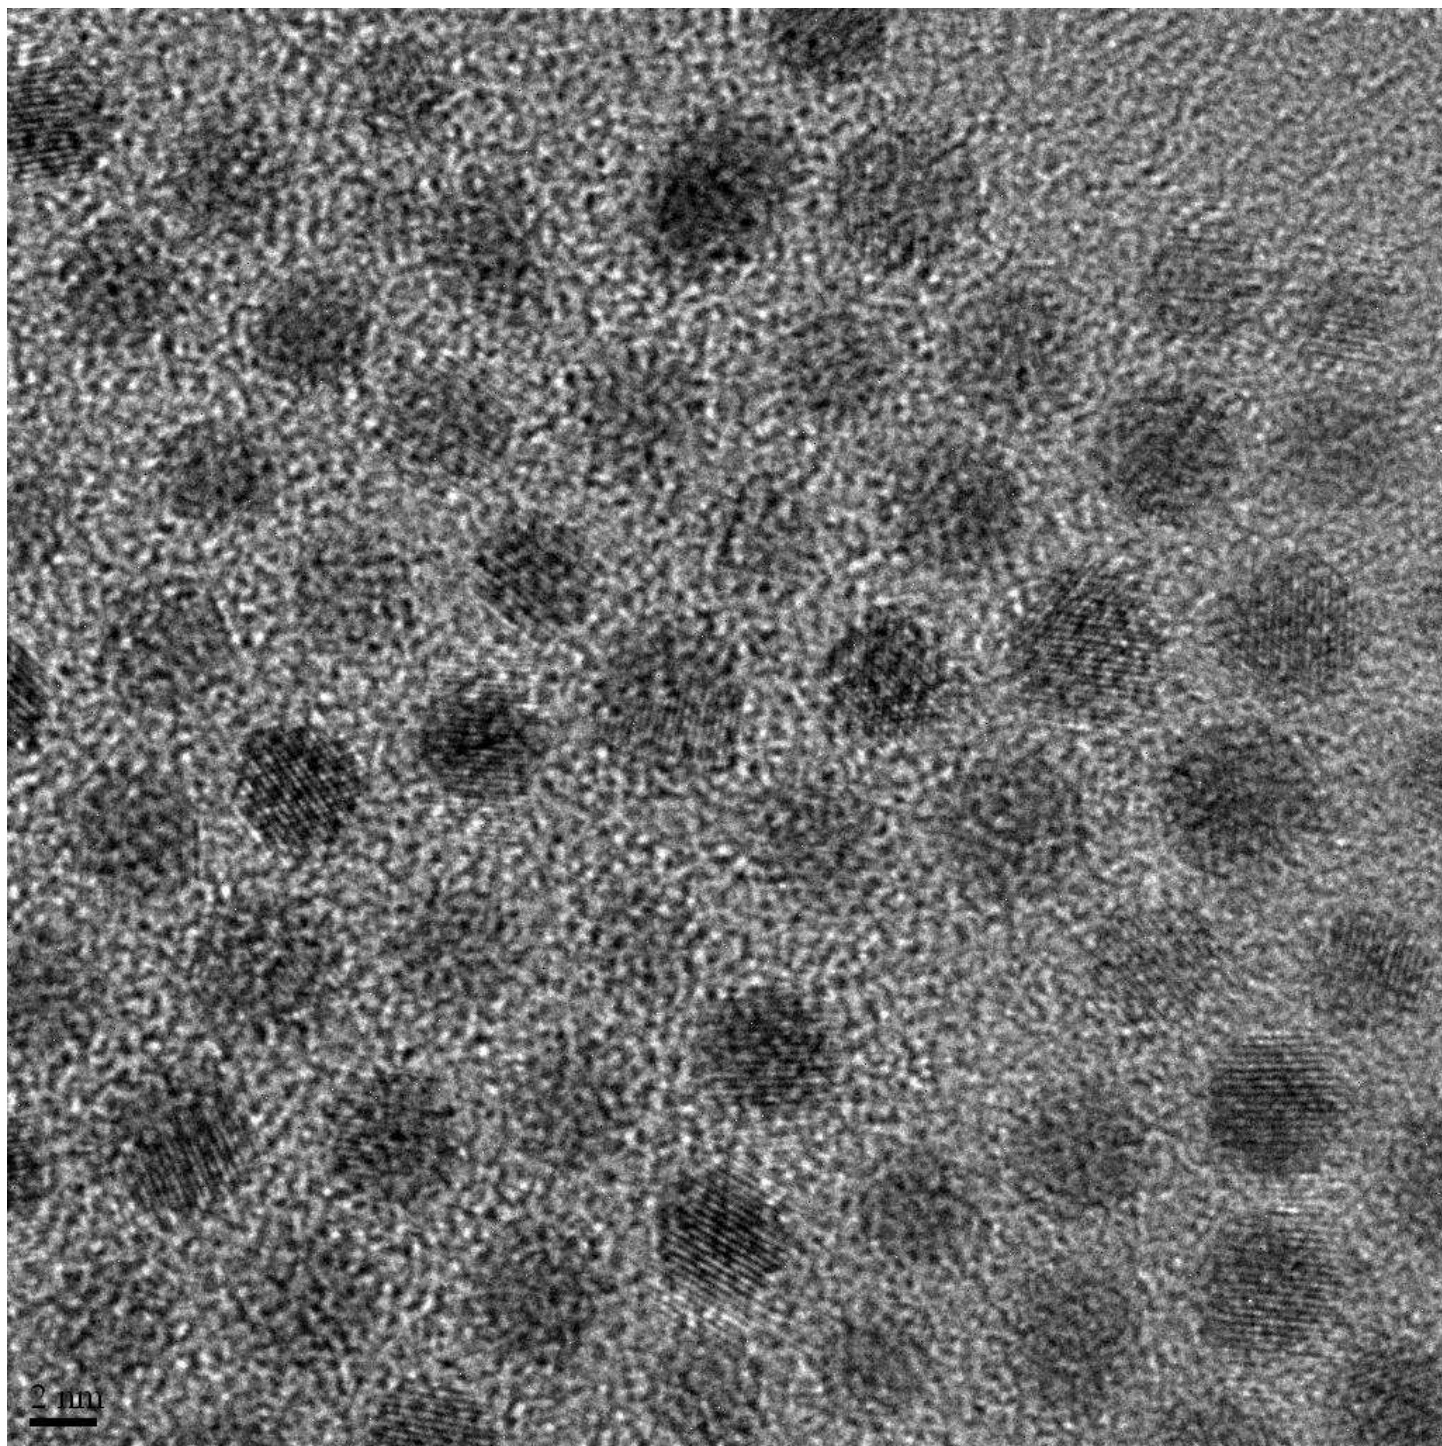

**SI-Figure 6:** HRTEM images of AuNPs 65 minutes after addition of 9-BBN.



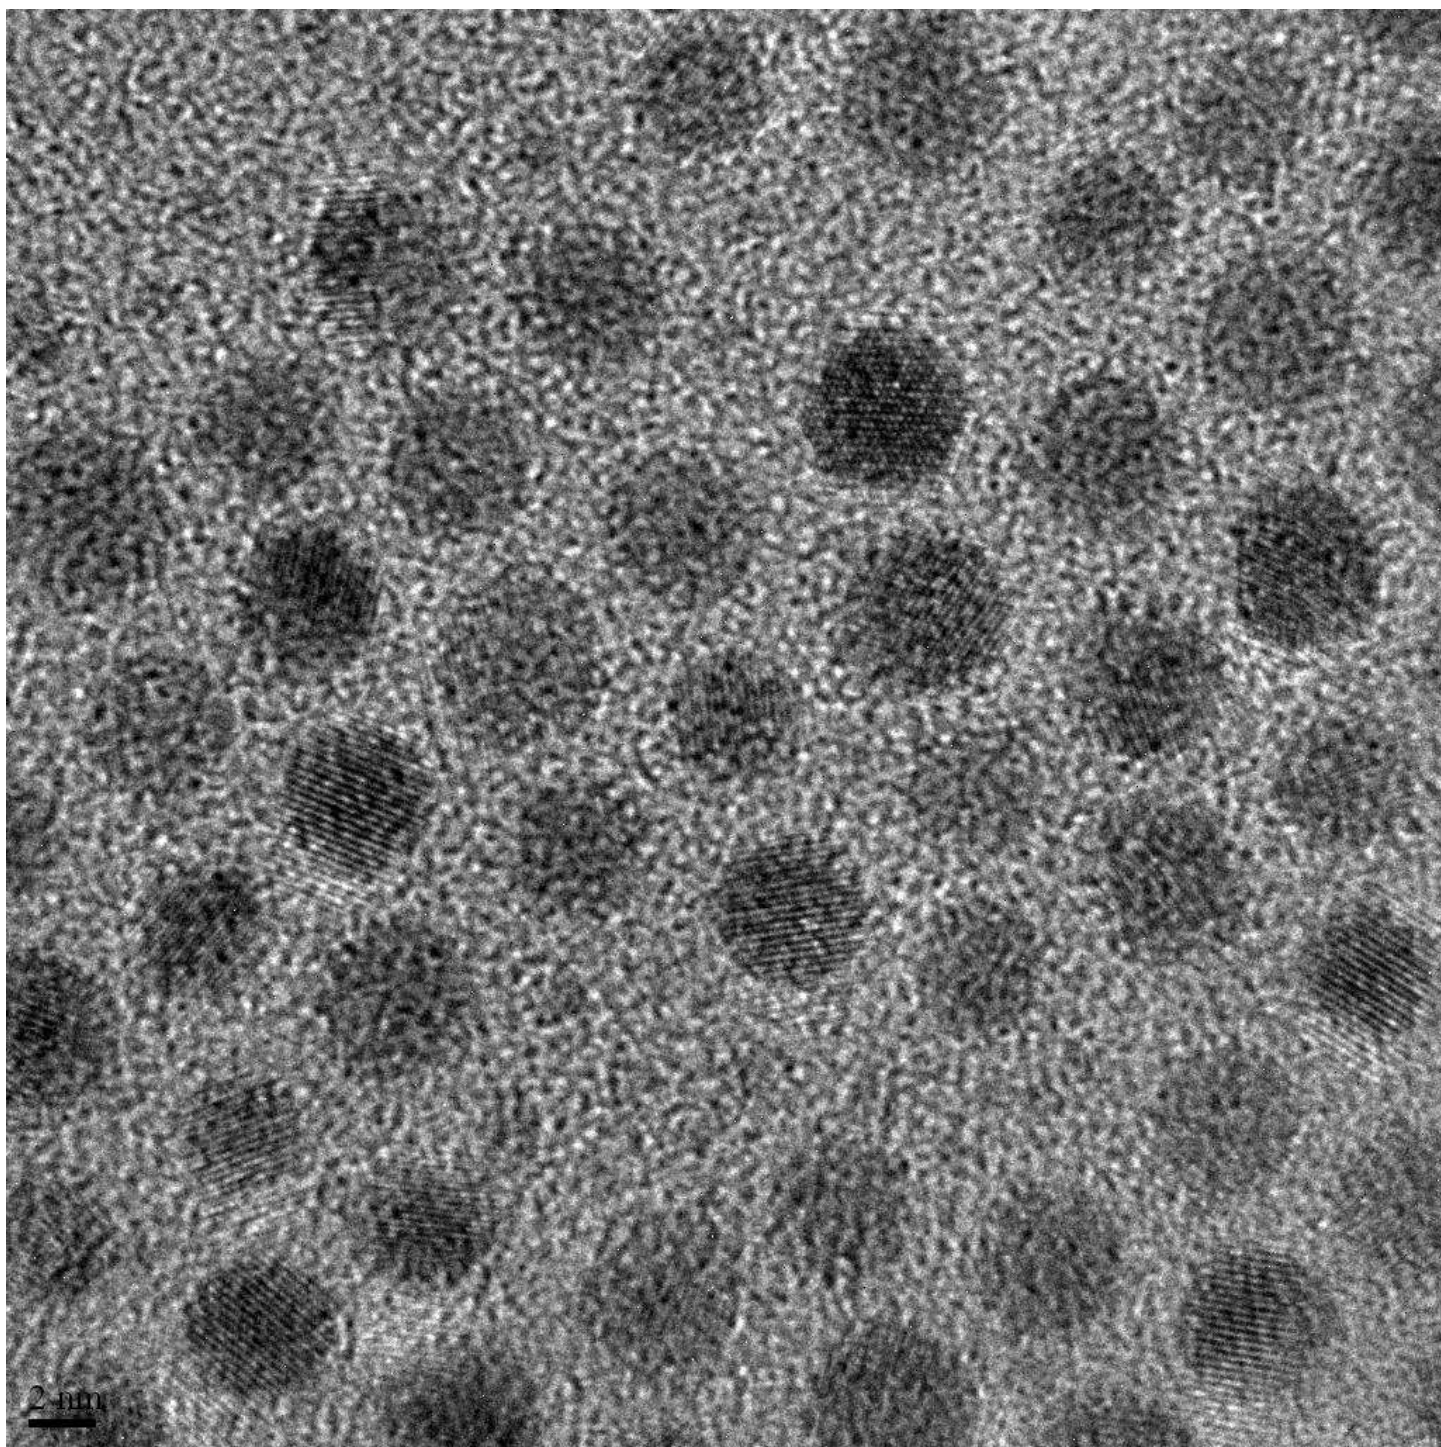

**SI-Figure 7:** HRTEM images of AuNPs 65 minutes after addition of 9-BBN.
